# Supplementary material
Source: publisher site journal article supplement (https://www.dovepress.com/article/508140)
Supplement: Supplementary file 1 [file 05_Mar_2025_Supplementary_Figures_1.pdf › 05_Mar_2025_Supplementary_Figures_1.pdf]

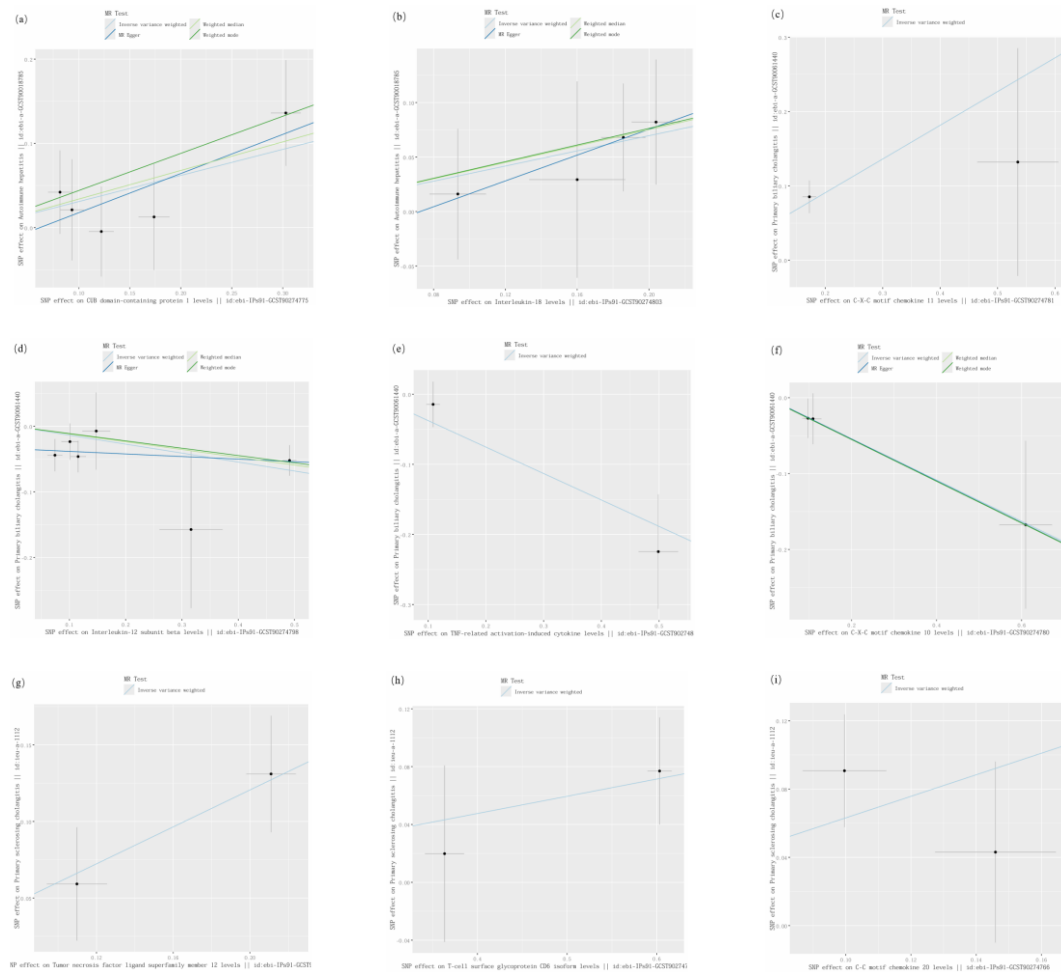

**Supplementary Figure 1** Scatter plots between circulating inflammatory proteins and AILD using univariable MR and bidirectional MR. (a) CUB domain-containing protein 1 levels and AIH; (b) Interleukin-18 and AIH; (c) C-X-C motif chemokine 11 and PBC; (d) Interleukin-12 subunit beta and PBC; (e) TNF-related activation-induced cytokine and PBC; (f) C-X-C motif chemokine 10 and PBC; (g) Tumor necrosis factor ligand superfamily member 12 and PSC; (h) T-cell surface glycoprotein CD6 isoform and PSC; (i) C-C motif chemokine 20 and PSC. Abbreviation AILD: autoimmune liver disease; MR: mendelian randomization; AIH: autoimmune hepatitis; PBC: primary biliary cholangitis; PSC: primary sclerosing cholangitis.

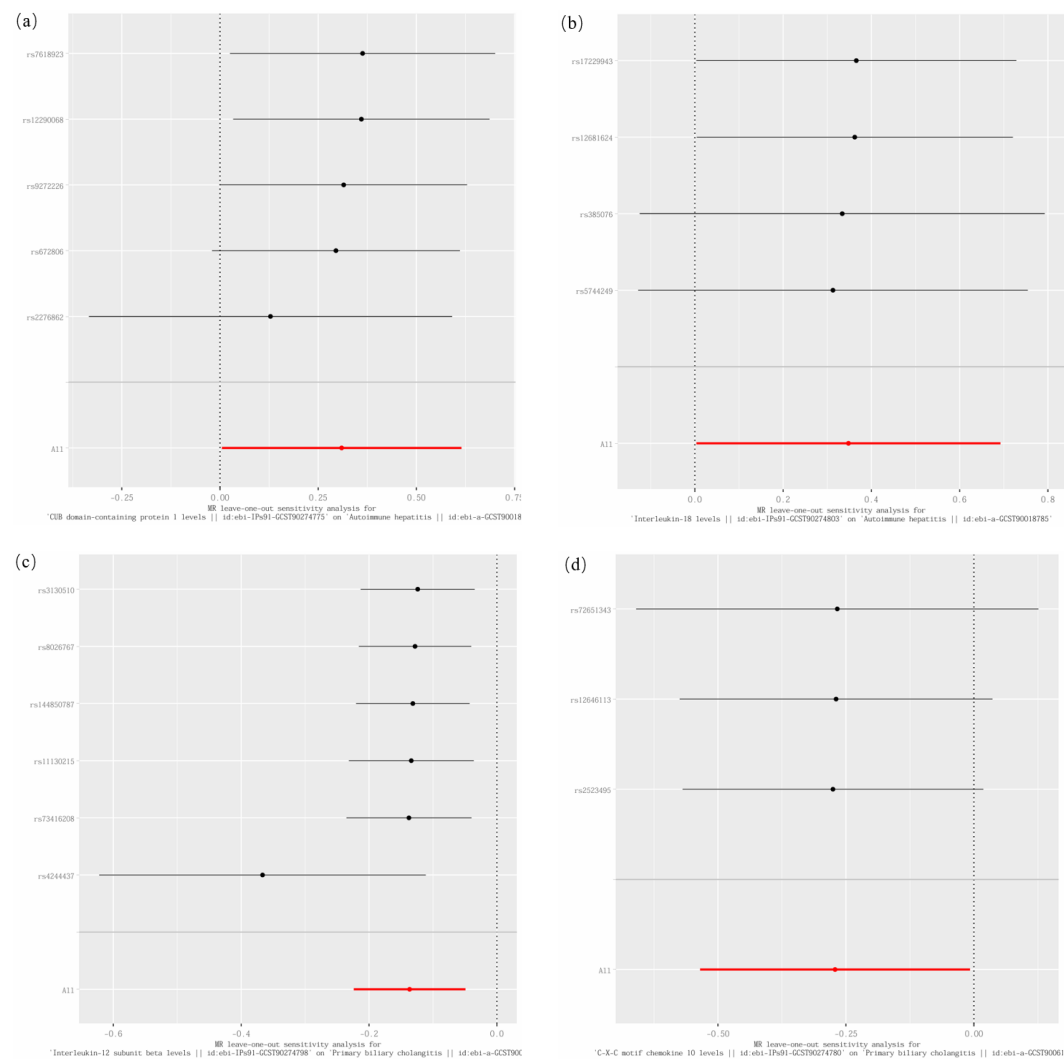

**Supplementary Figure 2** Leave-one-out plots between circulating inflammatory proteins and AILD using univariable MR and bidirectional MR. (a) CUB domain-containing protein 1 levels and AIH; (b) Interleukin-18 and AIH; (c) Interleukin-12 subunit beta and PBC; (d) C-X-C motif chemokine 10 and PBC. Abbreviation AILD: autoimmune liver disease; MR: mendelian randomization; AIH: autoimmune hepatitis; PBC: primary biliary cholangitis; PSC: primary sclerosing cholangitis.

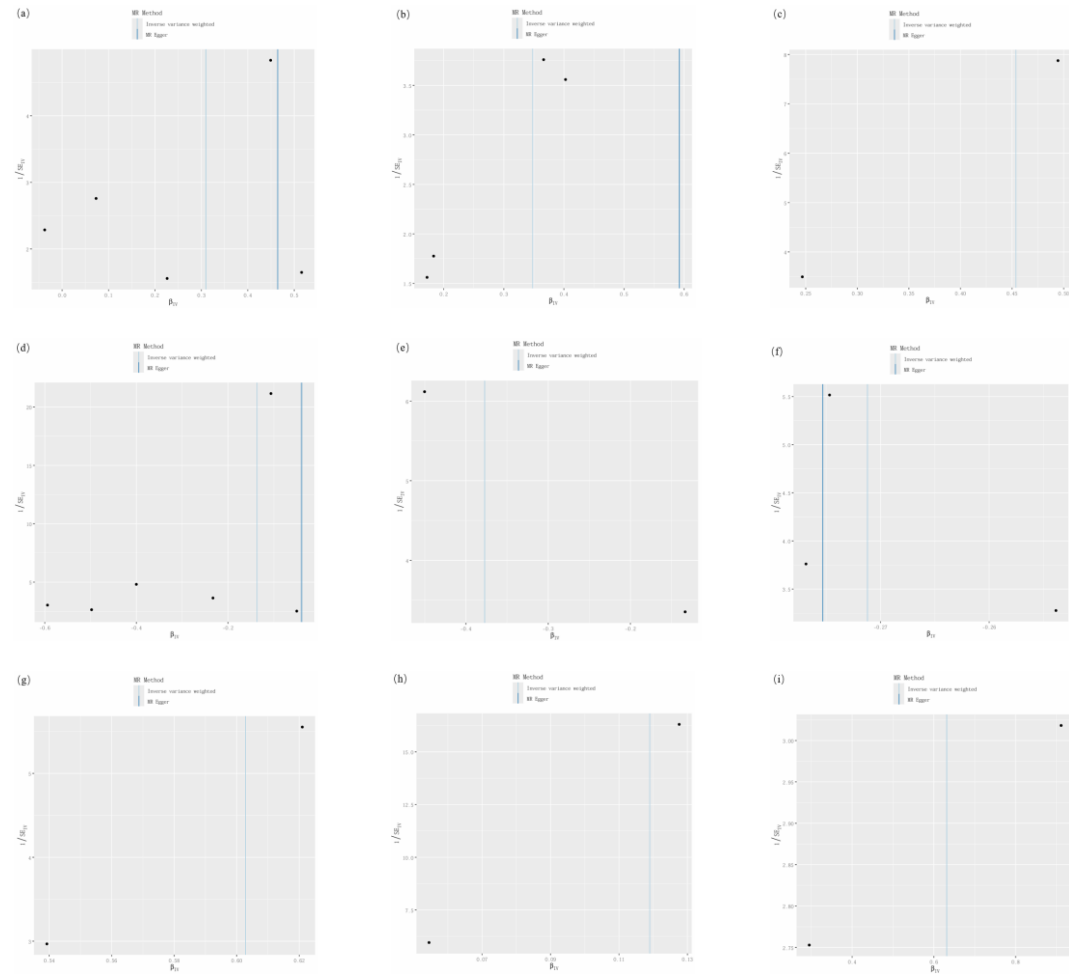

**Supplementary Figure 3** Funnel plots between circulating inflammatory proteins and AILD using univariable MR and bidirectional MR. (a) CUB domain-containing protein 1 levels and AIH; (b) Interleukin-18 and AIH; (c) C-X-C motif chemokine 11 and PBC; (d) Interleukin-12 subunit beta and PBC; (e) TNF-related activation-induced cytokine and PBC; (f) C-X-C motif chemokine 10 and PBC; (g) Tumor necrosis factor ligand superfamily member 12 and PSC; (h) T-cell surface glycoprotein CD6 isoform and PSC; (i) C-C motif chemokine 20 and PSC. Abbreviation AILD: autoimmune liver disease; MR: mendelian randomization; AIH: autoimmune hepatitis; PBC: primary biliary cholangitis; PSC: primary sclerosing cholangitis.
